# Supplementary material for: Optimization of MAE for the Separation of Nicotine and Phenolics from Tobacco Waste by Using the Response Surface Methodology Approach
Source: MDPI journal article supplement (doi:10.3390/molecules26144363), 2021-07-19

## Supplementary Materials

# Optimization of MAE for the Separation of Nicotine and Phenolics from Tobacco Waste by Using the Response Surface Methodology Approach

Marija Banožić <sup>1</sup>, Ines Banjari <sup>1</sup>, Ivana Flanjak <sup>1</sup>, Mate Paštar <sup>2</sup>, Jelena Vladić <sup>3,\*</sup> and Stela Jokić <sup>1,\*</sup>

<sup>1</sup> Faculty of Food Technology Osijek, Josip Juraj Strossmayer University of Osijek, Franje Kuhača 18, 31000 Osijek, Croatia; marija.banozic@ptfos.hr (M.B.); ines.banjari@ptfos.hr (I.B.); ivana.flanjak@ptfos.hr (I.F.)

<sup>2</sup> Public Institution RERA S.D. for Coordination and Development of Split-Dalmatia County, Domovinskog rata 2, 21000 Split, Croatia; mate.pastar@rera.hr

<sup>3</sup> Faculty of Technology, University of Novi Sad, Bulevar cara Lazara 1, 21 000 Novi Sad, Serbia

\* Correspondence: vladicj@uns.ac.rs (J.V.); stela.jokic@ptfos.hr (S.J.);  
Tel.: + 381-21-485-3728 (J.V.); +385-31-224-333 (S.J.)

**Table S1.** Spearman's Rank order correlations between yield per every sample and particular components in tobacco leaves and waste extracts

| Yield                                                                                                                             | Nicotine | CA     | NCA    | CCA    | Nicotiflorin | Rutin   | DPPH   | TPC    |
|-----------------------------------------------------------------------------------------------------------------------------------|----------|--------|--------|--------|--------------|---------|--------|--------|
| Leaves                                                                                                                            | -0.275   | -0.100 | 0.120  | 0.419  | 0.520*       | 0.265   | -0.032 | 0.568* |
| Scrap                                                                                                                             | -0.358   | -0.434 | 0.064  | 0.070  | 0.028        | -0.530* | 0.147  | 0.067  |
| Dust                                                                                                                              | -0.566*  | -0.066 | -0.096 | -0.265 | -0.718*      | -0.539* | -0.471 | -0.272 |
| Midrib                                                                                                                            | -0.574*  | -0.370 | 0.164  | -0.180 | -0.524*      | -0.157  | 0.199  | 0.152  |
| CA- chlorogenic acid, NCA-neochlorogenic acid, CCA- cryptochlorogenic acid, TPC- total phenol content, DPPH- antiradical activity |          |        |        |        |              |         |        |        |

\*statistically significant at  $p < 0.05$ **Table S2.** Comparison in yield, particular content of compounds, antiradical activity (DPPH) and total phenolic content (TPC) in tobacco leaves and waste extracts

|                                                                                                                                   | Leaves                   | Dust                     | <i>p</i> | Scrap                    | <i>p</i> | Midrib                         | <i>p</i> |
|-----------------------------------------------------------------------------------------------------------------------------------|--------------------------|--------------------------|----------|--------------------------|----------|--------------------------------|----------|
| Yield                                                                                                                             | 49.3 ± 10.7              | 40.68<br>(38.32 - 47.96) | 0.017*   | 47.08<br>(43.20 - 50.12) | 0.344    | 40.68<br>(38.32 - 47.96)       | 0.017*   |
| Nicotine                                                                                                                          | 4.78<br>(4.25 - 5.11)    | 3.349<br>(3.196 - 3.505) | 0.003*   | 2.980 ± 0.533            | <0.001*  | 1.415 ± 0.208                  | <0.001*  |
| CA                                                                                                                                | 0.894<br>(0.822-0.979)   | 0.737<br>(0.473 - 0.945) | 0.286    | 0.365 ± 0.095            | <0.001*  | 0.193<br>(0.185 - 0.211)       | <0.001*  |
| NCA                                                                                                                               | 0.229 ± 0.087            | 0.232<br>(0.203 - 0.245) | 0.836    | 0.162<br>(0.138 - 0.188) | 0.003*   | 0.077<br>(0.070 - 0.090)       | 0.005*   |
| CCA                                                                                                                               | 0.185 (0.161 - 0.229)    | 0.066<br>(0.038 - 0.116) | 0.002*   | 0.050<br>(0.041 - 0.064) | <0.001*  | 102.000<br>(0.444 - 102.000)   | 0.002*   |
| Nicotiflorin                                                                                                                      | 0.003 (0.002 - 0.006)    | 0.074<br>(0.050 - 0.088) | <0.001*  | 0.052<br>(0.043 - 0.057) | <0.001*  | 102.000<br>(102.000 - 102.000) | <0.001*  |
| Rutin                                                                                                                             | 0.354 ± 0.134            | 0.485<br>(0.313 - 0.514) | 0.168    | 0.265<br>(0.251 - 0.326) | 0.129    | 0.104<br>(0.099 - 0.119)       | <0.001*  |
| DPPH                                                                                                                              | 76.414 (72.675 - 81.304) | 23.578 ± 8.058           | <0.001*  | 52.415 ± 10.705          | <0.001*  | 40.938 ± 10.527                | <0.001*  |
| TPC                                                                                                                               | 3.933 (3.644 - 4.144)    | 2.071 ± 0.503            | <0.001*  | 3.937 ± 0.572            | 0.605    | 1,393<br>(1.280 - 1.713)       | <0.001*  |
| CA- chlorogenic acid, NCA-neochlorogenic acid, CCA- cryptochlorogenic acid, TPC- total phenol content, DPPH- antiradical activity |                          |                          |          |                          |          |                                |          |

Mann-Whitney U test; \*significant at  $p < 0.05$

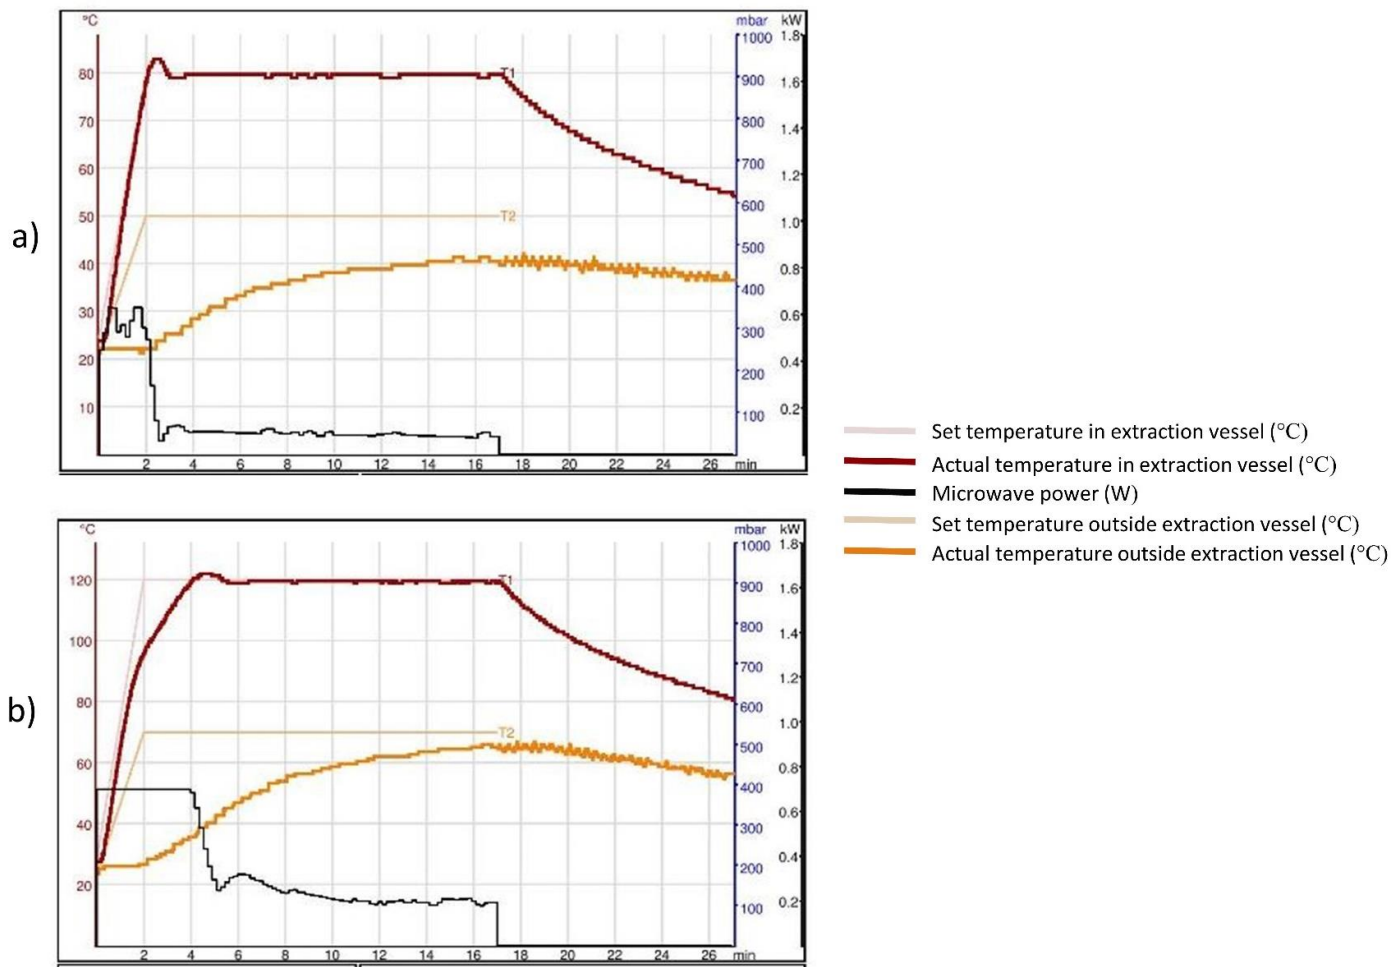

Supplement: s1 [file s1]
